# Supplementary material
Source: PubMed Central journal article supplement (PMC9680935)
Supplement: NIHMS1851054-supplement-Supplement_Info.pdf [file NIHMS1851054-supplement-Supplement_Info.pdf]

## **Supporting Information:**

### **Nitric Oxide-Releasing Lock Solution for the Prevention of Catheter-Related Infection and Thrombosis**

*Morgan Ashcraft,<sup>1</sup> Megan Douglass,<sup>2</sup> Mark Garren,<sup>2</sup> Arnab Mondal,<sup>2</sup> Lori Estes Bright,<sup>2</sup> Yi Wu,<sup>2</sup> Hitesh Handa<sup>1,2\*</sup>*

<sup>1</sup>Pharmaceutical and Biomedical Sciences Department, College of Pharmacy, University of Georgia, Athens, Georgia 30602, United States

<sup>2</sup>School of Chemical, Materials and Biomedical Engineering, College of Engineering, University of Georgia, Athens, Georgia 30602, United States

*\*Corresponding author*

*Dr. Hitesh Handa*

*Associate Professor*

*University of Georgia*

*220 Riverbend Road*

*Athens, GA 30602*

*Telephone: (706) 542-8109*

*E-mail: [hhanda@uga.edu](mailto:hhanda@uga.edu)*

## Supplementary Tables

**Table S1. Calculated P Values for NO Release Over Time (Figure 1 C).**

| Comparison    | NOrLS<br>(1 mg/mL) | NOrLS<br>(5 mg/mL) | NOrLS<br>(10 mg/mL) | NOrLS<br>(20 mg/mL) |
|---------------|--------------------|--------------------|---------------------|---------------------|
| 0 h vs. 12 h  | 0.9999             | 0.8573             | <0.0001             | <0.0001             |
| 0 h vs. 24 h  | 0.9998             | 0.1219             | <0.0001             | <0.0001             |
| 0 h vs. 36 h  | 0.9999             | 0.02               | <0.0001             | <0.0001             |
| 0 h vs. 48 h  | >0.9999            | 0.0197             | <0.0001             | <0.0001             |
| 12 h vs. 24 h | >0.9999            | 0.5919             | 0.2755              | 0.0001              |
| 12 h vs. 36 h | >0.9999            | 0.1884             | 0.0052              | <0.0001             |
| 12 h vs. 48 h | >0.9999            | 0.1862             | 0.0015              | <0.0001             |
| 24 h vs. 36 h | >0.9999            | 0.9375             | 0.4432              | <0.0001             |
| 24 h vs. 48 h | >0.9999            | 0.9357             | 0.223               | <0.0001             |
| 36 h vs. 48 h | >0.9999            | >0.9999            | 0.9921              | <0.0001             |

**Table S2. Calculated P Values for MRSA Time Kill (Figure 2 A).**

| Comparison                   | 2 h     | 8 h     | 24 h    |
|------------------------------|---------|---------|---------|
| Control vs. VAN              | 0.0062  | <0.0001 | <0.0001 |
| Control vs. GEN              | <0.0001 | <0.0001 | <0.0001 |
| Control vs. NOrLS (1 mg/mL)  | 0.9954  | 0.9963  | 0.8742  |
| Control vs. NOrLS (5 mg/mL)  | 0.3155  | <0.0001 | <0.0001 |
| Control vs. NOrLS (10 mg/mL) | <0.0001 | <0.0001 | <0.0001 |
| Control vs. NOrLS (20 mg/mL) | <0.0001 | <0.0001 | <0.0001 |

**Table S3. Calculated P Values for MDR *P. aeruginosa* Time Kill (Figure 2 B).**

| Comparison                   | 2 h     | 8 h     | 24 h    |
|------------------------------|---------|---------|---------|
| Control vs. VAN              | <0.0001 | <0.0001 | <0.0001 |
| Control vs. GEN              | <0.0001 | <0.0001 | <0.0001 |
| Control vs. NOrLS (1 mg/mL)  | 0.7219  | 0.9999  | 0.8326  |
| Control vs. NOrLS (5 mg/mL)  | 0.0392  | <0.0001 | <0.0001 |
| Control vs. NOrLS (10 mg/mL) | <0.0001 | <0.0001 | <0.0001 |
| Control vs. NOrLS (20 mg/mL) | <0.0001 | <0.0001 | <0.0001 |

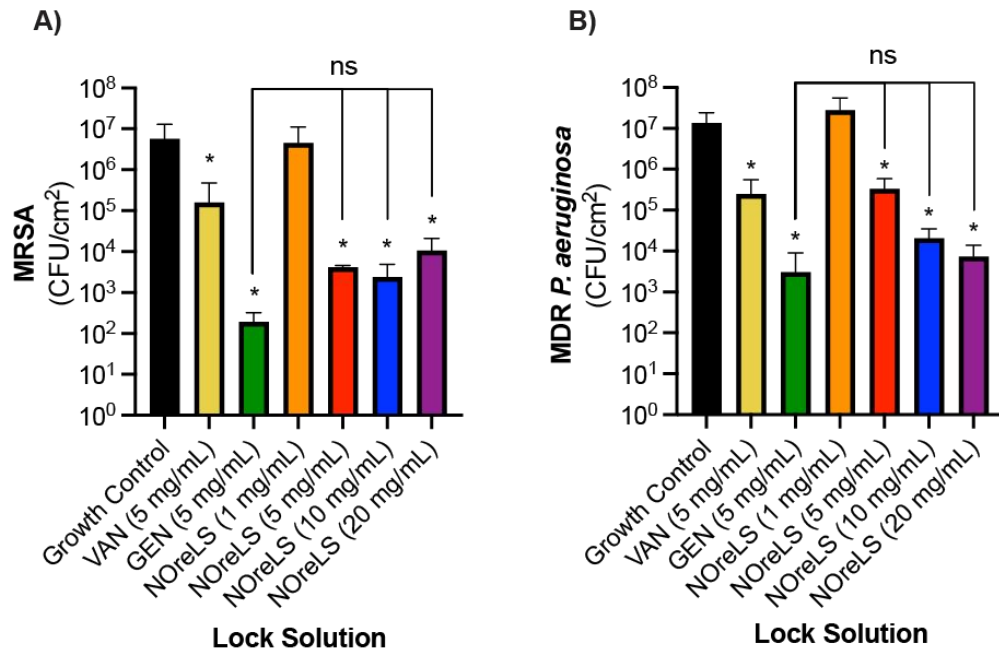

**Figure S1.** MRSA (A) and MDR *P. aeruginosa* (B) adherence to medical grade tubing after 24 h bacterial exposure and 2 h lock therapy. \* $p < 0.05$  compared to control; ns is not statistically significant. Data are shown as the mean  $\pm$  standard deviation.  $N = 6$ .
